## Long-term impact of transient atrioventricular block during atrioventricular nodal re-entrant tachycardia ablation

Marco Clement I.; Cossiani Martinez M.; Castrejon Castrejon S.; Alvarez Ortega C.; Martin Polo L.; Merino Argos C.; Tebar D.; Poveda ID.; Arbas E.; Caro Codon J.; Lopez-De-Sa E.; Peinado Peinado R.; Merino Llorens JL.

University Hospital La Paz, Madrid, Spain

**Funding Acknowledgements:** Type of funding sources: None.

**Introduction:** Ablation of atrioventricular nodal re-entrant tachycardia (AVNRT) is an extremely safe procedure, being complete atrioventricular (AV) block the most feared complication. Transient AV or ventriculoatrial (VA) block during ablation is considered a risk marker of immediate AV permanent block.

**Purpose:** To study whether TB (transient block) during AVNRT ablation is associated with a higher risk of AV permanent block and pacemaker implantation during long term follow-up.

**Methods:** Retrospective analysis of all patients who underwent ablation for AVNRT in our center and had a minimum five years follow-up. Patients carrying a cardiac pacing device were excluded. Data was extracted from electronic medical records and follow-up was performed by telephone contact. TB was defined as AV or VA loss of conduction of at least 1 beat during energy delivery.

**Results:** We included 689 patients who underwent AVNRT ablation from March 1995 to December 2015: mean age  $52.6 \pm 18.6$  years; 240 (34.8%) male; 677 radiofrequency and 12 cryotherapy ablations. TB was observed in 106 (15.4%) patients. Baseline characteristics are described in Table 1. Within the TB group, 44 (41.5%) patients presented with AV block, 60 (56.6%) with VA block, and 2 patients presented with both. TB concerned more than one beat in 65 (61.9%) cases and persisted after cessation of energy delivery in 15 (14.2%) cases. Two patients did not recover AV conduction, requiring pacemaker implantation before discharge.

During a median 12.5 years follow-up (IQR 9.5-16.6), 3 of the remaining 104 TB patients required pacemaker implantation due to AV block. All 3 had presented AV TB and had undergone radiofrequency ablation; they were not significantly older ( $67.0 \pm 9.3$  vs  $48.8 \pm 19.8$ ,  $p = 0.12$ ) but presented longer basal PR ( $237.0 \pm 115.2$  vs  $152.6 \pm 26.5$ ,  $p < 0.001$ ) and HV ( $57.3 \pm 6.7$  vs  $44.2 \pm 7.6$ ,  $p = 0.004$ ) intervals. When compared to the non-TB group, there were no differences in pacemaker implantation due to AV block during follow-up (7 (1.2%)  $p = 0.19$ ). However, median time to pacemaker implantation was shorter in TB patients than in non-TB: 0.7 [0.1-1.4] vs 13.7 [5.2-22.0],  $p = 0.02$ .

**Conclusion:** Long term incidence of permanent AV block did not differ between TB and non-TB groups, however AV block occurred significantly earlier in TB patients.

|                     | Non-TB group(n = 583) | TB group(n = 106) | p    |
|---------------------|-----------------------|-------------------|------|
| Age (mean $\pm$ SD) | $53.2 \pm 18.3$       | $49.3 \pm 19.8$   | 0.05 |
| PR (mean $\pm$ SD)  | $153.0 \pm 28.4$      | $155.0 \pm 33.8$  | 0.54 |
| AH (mean $\pm$ SD)  | $83.3 \pm 23.6$       | $82.1 \pm 22.2$   | 0.64 |
| HV (mean $\pm$ SD)  | $44.4 \pm 7.8$        | $44.6 \pm 7.9$    | 0.76 |
